# Supplementary material for: A questionnaire-based survey of COVID-19 transmission in dental practice during the pandemic:comparison between the 1st-5th and the 6th-8th surges in Japan
Source: Research Square preprint supplement (doi:10.21203/rs.3.rs-3994095/v1), 2024-04-01
Supplement: Supplementary file 1 [file 58ca7de858bab2214798089f.pdf]

**Table 1. Clinical activities between February 2022 to March 2023**

| Questions                                                                                   |                                                                                     | Response | n   |       | %    |        |
|---------------------------------------------------------------------------------------------|-------------------------------------------------------------------------------------|----------|-----|-------|------|--------|
| Did you implement any restrictions on treatment and/or the patient?                         | Yes                                                                                 |          | 130 | (235) | 37.7 | (61.2) |
|                                                                                             | No                                                                                  |          | 215 | (149) | 62.3 | (38.8) |
| If yes, what type of restriction did you implement? (multiple answers allowed)              | Suspension of treatment                                                             |          | 13  | (27)  | 10.0 | (11.5) |
|                                                                                             | Restriction/coordination of patient number                                          |          | 119 | (194) | 91.5 | (82.6) |
|                                                                                             | Stop accepting new patients                                                         |          | 5   | (21)  | 3.8  | (8.9)  |
|                                                                                             | Patient (disease) limitations (only urgent and/or critical patients)                |          | 21  | (53)  | 16.2 | (22.6) |
|                                                                                             | Restriction of aerosol-generating procedures (e.g., limit the number of procedures) |          | 11  | (42)  | 8.5  | (17.9) |
|                                                                                             | Prohibition of procedures involving splashes                                        |          | 5   | (29)  | 3.8  | (12.3) |
|                                                                                             | Others                                                                              |          | 2   | (0)   | 1.5  | (0)    |
| What was your policy for dealing with dental patients with suspected or confirmed COVID-19? | Postpone the treatment                                                              |          | 202 | (220) | 58.6 | (57.3) |
|                                                                                             | Provide palliative/emergency care                                                   |          | 95  | (77)  | 27.5 | (20.1) |
|                                                                                             | Provide care with infection control measures                                        |          | 13  | (14)  | 3.8  | (3.6)  |
|                                                                                             | Referral to hospital dentistry                                                      |          | 17  | (36)  | 4.9  | (9.4)  |
|                                                                                             | Others                                                                              |          | 18  | (7)   | 5.2  | (1.8)  |

Results in parentheses are for 2020/Feb. – 2021/Sep.

Abbreviation: COVID-19, coronavirus disease 2019

**Table 2. Infection control measures between February 2022 to March 2023**

| <b>Questions</b>                                                                                      |                                                                                          | <b>Response</b> |  | <b>n</b> |       | <b>%</b> |        |
|-------------------------------------------------------------------------------------------------------|------------------------------------------------------------------------------------------|-----------------|--|----------|-------|----------|--------|
| Vaccination status                                                                                    | All staff completed                                                                      |                 |  | 278      | (296) | 80.6     | (77.1) |
|                                                                                                       | Some staff completed                                                                     |                 |  | 57       | (84)  | 16.5     | (21.9) |
|                                                                                                       | None completed                                                                           |                 |  | 10       | (4)   | 2.9      | (1.0)  |
| Did you perform any entrance screening?                                                               | Yes                                                                                      |                 |  | 322      | (370) | 93.3     | (96.4) |
|                                                                                                       | No                                                                                       |                 |  | 23       | (14)  | 6.7      | (3.6)  |
| If yes, what type of screening did you perform? (multiple answers allowed)                            | Ask for symptoms/signs, close contact exposure, and travel from endemic area of COVID-19 |                 |  | 262      | (334) | 81.4     | (87.0) |
|                                                                                                       | Body temperature measurement                                                             |                 |  | 290      | (343) | 90.1     | (89.3) |
|                                                                                                       | Wear a mask                                                                              |                 |  | 286      | (346) | 88.8     | (90.1) |
|                                                                                                       | Hand hygiene compliance                                                                  |                 |  | 262      | (331) | 81.4     | (86.2) |
|                                                                                                       | Antigen test                                                                             |                 |  | 5        | (6)   | 1.6      | (1.6)  |
| What infection control measures were employed during the procedures generating splash and/or aerosol? | Use of surgical mask                                                                     |                 |  | 261      | (326) | 75.7     | (84.9) |
|                                                                                                       | Use of N95 mask                                                                          |                 |  | 68       | (56)  | 19.7     | (14.6) |
|                                                                                                       | Use of surgical gloves                                                                   |                 |  | 333      | (377) | 96.5     | (98.2) |
|                                                                                                       | Use of face/eye guard                                                                    |                 |  | 276      | (337) | 80.0     | (87.8) |
|                                                                                                       | Use of surgical gown                                                                     |                 |  | 39       | (42)  | 11.3     | (10.9) |
|                                                                                                       | Use of surgical apron                                                                    |                 |  | 108      | (134) | 31.3     | (34.9) |
|                                                                                                       | Use of cap                                                                               |                 |  | 91       | (106) | 26.4     | (27.6) |
|                                                                                                       | Use of extraoral dental suction device                                                   |                 |  | 259      | (305) | 75.1     | (79.4) |
|                                                                                                       | Cleaning of possibly contaminated surface                                                |                 |  | 320      | (365) | 92.8     | (95.1) |
|                                                                                                       | Cover possibly contaminated surface                                                      |                 |  | 63       | (77)  | 18.3     | (20.1) |
|                                                                                                       | Mouth rinse with water                                                                   |                 |  | 83       | (100) | 24.1     | (26.0) |
|                                                                                                       | Mouth rinse with mouthwash                                                               |                 |  | 200      | (221) | 58.0     | (57.6) |
|                                                                                                       | Installation of partition between units                                                  |                 |  | 168      | (181) | 48.7     | (47.1) |
|                                                                                                       | Installation of air purifiers                                                            |                 |  | 268      | (289) | 77.7     | (75.0) |
|                                                                                                       | Treatment in negative pressure room                                                      |                 |  | 1        | (2)   | 0.3      | (0.5)  |

Results in parentheses are for 2020/Feb. – 2021/Sep.

Abbreviation: COVID-19, coronavirus disease 2019

**Table 3. Dental treatment for patients with confirmed COVID-19 between February 2022 to March 2023**

| Questions                                                                       | Response                                             | n         | %           |
|---------------------------------------------------------------------------------|------------------------------------------------------|-----------|-------------|
| Did you have any experience of dental treatment for confirmed COVID-19 patient? | Yes                                                  | 17*(9)    | 4.9 (2.3)   |
|                                                                                 | No                                                   | 328 (375) | 95.1 (97.7) |
| If yes, what procedure was performed? (multiple answers allowed)                | Root canal treatment                                 | 4         |             |
|                                                                                 | Medication                                           | 3         |             |
|                                                                                 | Prosthetics (fitting and abutment tooth preparation) | 2         |             |
|                                                                                 | Incision and drainage                                | 2         |             |
|                                                                                 | Tooth extraction                                     | 1         |             |
|                                                                                 | Oral Care                                            | 1         |             |
|                                                                                 | Details unknown                                      | 4         |             |
| Were there confirmed cases of viral transmission from patient to dental staff?  | Yes                                                  | 0         |             |
|                                                                                 | No                                                   | 17        |             |

Results in parentheses are for 2020/Feb. – 2021/Sep.

\* One before vaccination and sixteen after vaccination. Abbreviation: COVID-19, coronavirus disease 2019.

**Table 4. Close contact exposure to COVID-19-positive patient between February 2022 to March 2023**

| Questions                                                                                                           | Response                    | n         | %           |
|---------------------------------------------------------------------------------------------------------------------|-----------------------------|-----------|-------------|
| Did you have any experience of treating patients with close contact exposure to COVID-19-positive patient?          | Yes                         | 62* (18)  | 18.0 (4.7)  |
|                                                                                                                     | No                          | 283 (366) | 82.0 (95.3) |
| If yes, please describe how many days there were between treatment and confirmation of patient's COVID-19 infection | Within 3 days               | 39        |             |
|                                                                                                                     | 4 to 7 days                 | 16        |             |
|                                                                                                                     | 8 to 14 days                | 2         |             |
|                                                                                                                     | Unknown                     | 5         |             |
| If yes, what procedure was performed? (multiple answers allowed)                                                    | Dental scaling              | 16        |             |
|                                                                                                                     | Restoration of tooth caries | 13        |             |
|                                                                                                                     | Denture fitting/adjustment  | 6         |             |
|                                                                                                                     | Root canal treatment        | 5         |             |
|                                                                                                                     | Tooth extraction            | 4         |             |
|                                                                                                                     | Attach dental restorations  | 2         |             |
|                                                                                                                     | Orthodontic treatment       | 2         |             |
|                                                                                                                     | Local cleaning              | 1         |             |
|                                                                                                                     | Mandible fracture           | 1         |             |
|                                                                                                                     | Others                      | 8         |             |
| Were there confirmed cases of viral transmission from patient to dental staff?                                      | Yes                         | 0         |             |
|                                                                                                                     | No                          | 62        |             |

Results in parentheses are for 2020/Feb. – 2021/Sep.

\* Four before vaccination and 58 after vaccination. Abbreviation: COVID-19, coronavirus disease 2019.
